# Supplementary material for: Effect of Lifestyle Interventions during Pregnancy on Maternal Leptin, Resistin and Offspring Weight at Birth and One Year of Life
Source: MDPI journal article supplement (doi:10.3390/biomedicines11020447), 2023-02-03
Supplement: s1 [file s1]

## Supplemental Material

**Table S1.** Backward multiple linear regression analysis with BMI at birth as the outcome variable (first<sup>§</sup> and final models).

|    | Model <sup>§</sup>                          | $\beta$ -coefficient | P-value | R <sup>2</sup> |
|----|---------------------------------------------|----------------------|---------|----------------|
|    | Maternal age [year]                         | -0.062               | 0.741   |                |
|    | Group                                       | -0.100               | 0.655   |                |
|    | Pre-pregnancy BMI [kg/m <sup>2</sup> ]      | -0.256               | 0.500   |                |
|    | Realtive weight gain during pregnancy [%]   | -0.095               | 0.683   |                |
| 1  | Upper arm fat area at T1 [cm <sup>2</sup> ] | 1.163                | 0.009   | 0.229          |
|    | Upper arm fat area at T3 [cm <sup>2</sup> ] | -0.721               | 0.083   |                |
|    | Leptin level at T1 [pg/mL]                  | 0.144                | 0.655   |                |
|    | Leptin level at T2 [pg/mL]                  | -0.203               | 0.368   |                |
|    | Leptin level at T3 [pg/mL]                  | 0.302                | 0.264   |                |
|    | Resistin level at T1 [pg/mL]                | 0.035                | 0.894   |                |
|    | Resistin level at T2 [pg/mL]                | -0.456               | 0.104   |                |
|    | Resistin level at T3 [pg/mL]                | 0.127                | 0.508   |                |
| 10 | Upper arm fat area at T1 [cm <sup>2</sup> ] | 1.016                | ≤0.001  | 0.332          |
|    | Upper arm fat area at T3 [cm <sup>2</sup> ] | -0.601               | 0.019   |                |
|    | Resistin level at T2 [pg/mL]                | -0.315               | 0.023   |                |

<sup>§</sup>Due to multicollinearity "Upper arm fat area at T2 and Upper arm fat-free area at T1/T2/T3" was excluded from analysis. Abbreviations: BMI = body mass index; T1, T2, and T3 represent around 14, 24, and 36 weeks of gestation, respectively

**Table S2.** Backward multiple linear regression analysis with BMI at one year of age as the outcome variable (first<sup>§</sup> and final models).

|    | Model <sup>§</sup>                               | $\beta$ -coefficient | P-value | R <sup>2</sup> |
|----|--------------------------------------------------|----------------------|---------|----------------|
| 1  | Maternal age [year]                              | 0.113                | 0.590   | -0.006         |
|    | Group                                            | -0.082               | 0.739   |                |
|    | Realtive weight gain during pregnancy [%]        | -0.025               | 0.929   |                |
|    | Upper arm fat-free area at T1 [cm <sup>2</sup> ] | -0.201               | 0.558   |                |
|    | Upper arm fat-free area at T2 [cm <sup>2</sup> ] | -0.194               | 0.542   |                |
|    | Upper arm fat-free area at T3 [cm <sup>2</sup> ] | 0.609                | 0.092   |                |
|    | Leptin level at T1 [pg/mL]                       | -0.071               | 0.828   |                |
|    | Leptin level at T2 [pg/mL]                       | 0.102                | 0.691   |                |
|    | Leptin level at T3 [pg/mL]                       | 0.041                | 0.909   |                |
|    | Resistin level at T1 [pg/mL]                     | -0.409               | 0.175   |                |
|    | Resistin level at T2 [pg/mL]                     | 0.721                | 0.050   |                |
|    | Resistin level at T3 [pg/mL]                     | -0.175               | 0.465   |                |
|    | BMI-SDS at birth                                 | 0.098                | 0.612   |                |
| 10 | Upper arm fat-free area at T1 [cm <sup>2</sup> ] | -0.323               | 0.094   | 0.198          |
|    | Upper arm fat-free area at T3 [cm <sup>2</sup> ] | 0.534                | 0.011   |                |
|    | Resistin level at T1 [pg/mL]                     | -0.382               | 0.097   |                |
|    | Resistin level at T2 [pg/mL]                     | 0.585                | 0.012   |                |

§ Due to multicollinearity “Pre-pregnancy BMI and Upper arm fat area at T1/T2/T3” was excluded from analysis. Abbreviations: BMI = body mass index; T1, T2, and T3 represent around 14, 24, and 36 weeks of gestation, respectively
